# Supplementary material
Source: PubMed Central journal article supplement (PMC11072148)
Supplement: 18_2020_3750_MOESM2_ESM.pdf [file 18_2020_3750_MOESM2_ESM.pdf]

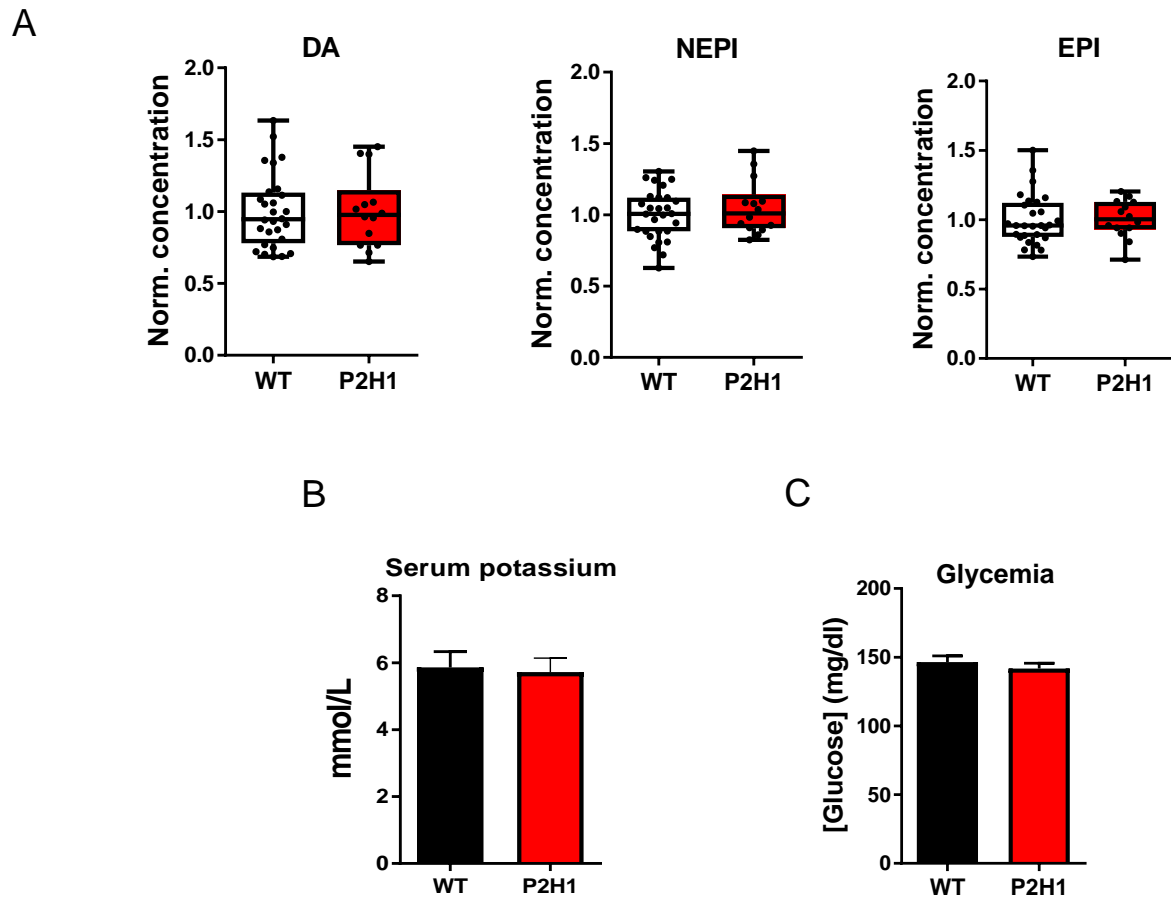

**Supplementary figure 1: Downstream effects of increased steroidogenesis.**

A. Box and whisker plots showing normalized concentrations of all catecholamines (dopamine, norepinephrine (NEPI), and epinephrine (EPI) measured in entire adrenal glands of P2H1 mice and their WT counterparts (n=14-28). Bar graphs represent, respectively: C. potassium levels in the serum of WT vs P2H1 mice (n=9-11) and D. Blood glucose levels in P2H1 mice vs WT littermate controls (n=5-8). Statistical significance was defined using the Mann-Whitney U test.

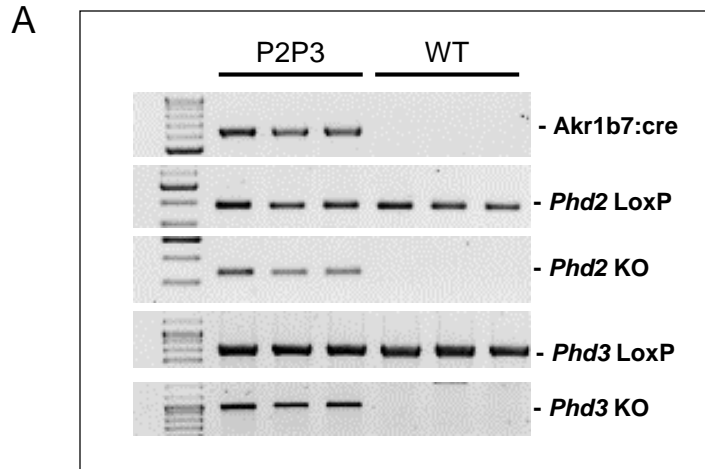

**Supplementary figure 2: Genetic identification of the Akkr1b7:cre-P2P3 strain.** A. Genomic PCRs for Akkr1b7:cre, Phd2 LoxP (400bp – fragment encompassing both LoxP sites), Phd2 KO (350 bp – shortened genomic fragment after excision), Phd3 LoxP (840bp - fragment encompassing both LoxP sites) and Phd3 KO (1000bp - shortened genomic fragment after excision) in entire adrenal gland tissue from P2P3 mice and their WT counterparts. 100bp DNA ladder (dense band = 500bp)

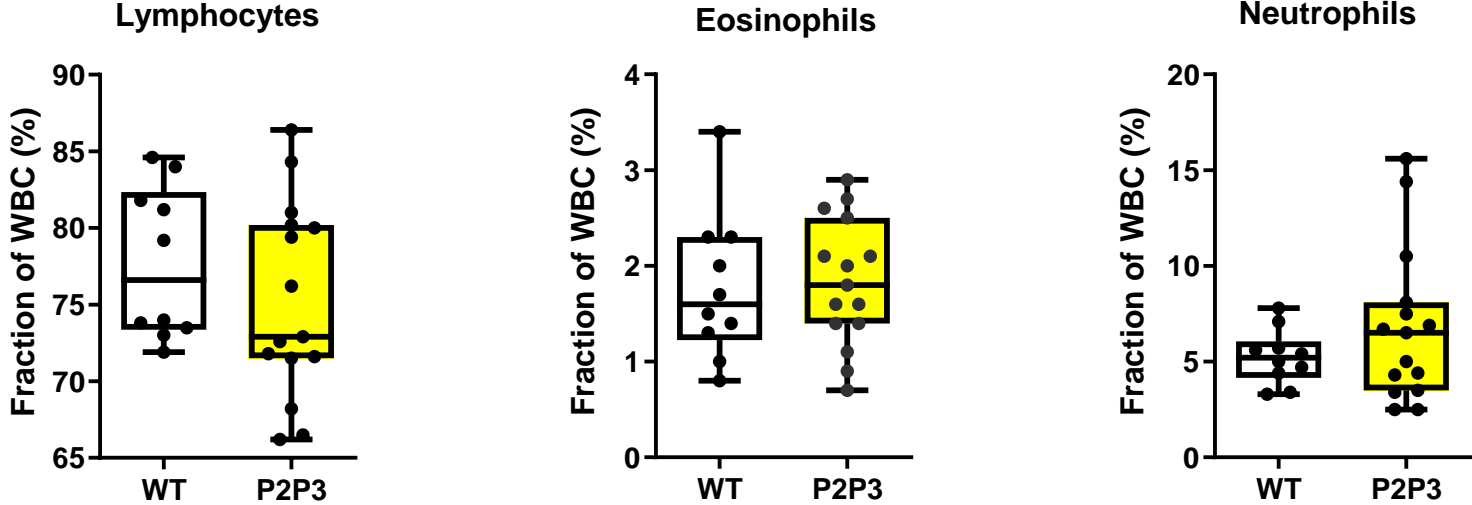

**Supplementary Figure 3: Immune cells in circulation in P2P3 mice.** Box and whisker plots showing percentage of lymphocytes, eosinophils and neutrophils in circulation. All graphs represent pooled results of >3 independent experiments.
